# Supplementary material for: Electron Beam-Treated Enzymatically Mineralized Gelatin Hydrogels for Bone Tissue Engineering
Source: MDPI journal article supplement (doi:10.3390/jfb12040057), 2021-10-08
Supplement: s1 [file s1]

# Electron Beam-Treated Enzymatically Mineralized Gelatin Hydrogels for Bone Tissue Engineering

Stefanie Riedel <sup>1,2,\*</sup>, Daniel Ward <sup>3</sup>, Radmila Kudláčková <sup>4</sup>, Karolina Mazur <sup>5</sup>, Lucie Bačáková <sup>4</sup>, Jemma G. Kerns <sup>6</sup>, Sarah L. Allinson <sup>3</sup>, Lorna Ashton <sup>7</sup>, Robert Konieczny <sup>1</sup>, Stefan G. Mayr <sup>1,2</sup> and Timothy E. L. Douglas <sup>8,9,\*</sup>

<sup>1</sup> Leibniz Institute of Surface Engineering (IOM), Permoserstraße 15, 04318 Leipzig, Germany; robert.konieczny@iom-leipzig.de (R.K.); stefan.mayr@iom-leipzig.de (S.G.M.)

<sup>2</sup> Division of Surface Physics, Faculty of Physics and Earth Science, Leipzig University, Linnéstraße 5, 04103 Leipzig, Germany

<sup>3</sup> Division of Biomedical and Life Sciences (BLS), Faculty of Health and Medicine, Furness College, Lancaster University, Lancaster LA1 4YG, UK; dannywlmr9@hotmail.co.uk (D.W.); s.allinson@lancaster.ac.uk (S.L.A.)

<sup>4</sup> Department of Biomaterials and Tissue Engineering, Institute of Physiology of the Czech Academy of Sciences, Vídeňská 1083, 142 00 Prague, Czech Republic; KudlackovaRadmila@seznam.cz (R.K.); Lucie.Bacakova@fgu.cas.cz (L.B.)

<sup>5</sup> Faculty of Materials Engineering and Physics, Institute of Materials Engineering, Tadeusz Kosciuszko Cracow University of Technology, al. Jana Pawła II 37, 31-864 Cracow, Poland; mazur117@o2.pl

<sup>6</sup> Lancaster Medical School, Faculty of Health and Medicine, Lancaster University, Lancaster LA1 4YW, UK; j.kerns@lancaster.ac.uk

<sup>7</sup> Chemistry Department, Lancaster University, Lancaster LA1 4YB, UK; l.ashton@lancaster.ac.uk

<sup>8</sup> Engineering Department, Lancaster University, Lancaster LA1 4YW, UK

<sup>9</sup> Materials Science Institute (MSI), Lancaster University, Lancaster LA1 4YW, UK

\* Correspondence: stefanie.riedel@iom-leipzig.de (S.R.); t.douglas@lancaster.ac.uk (T.E.L.D.).

## Cell population density

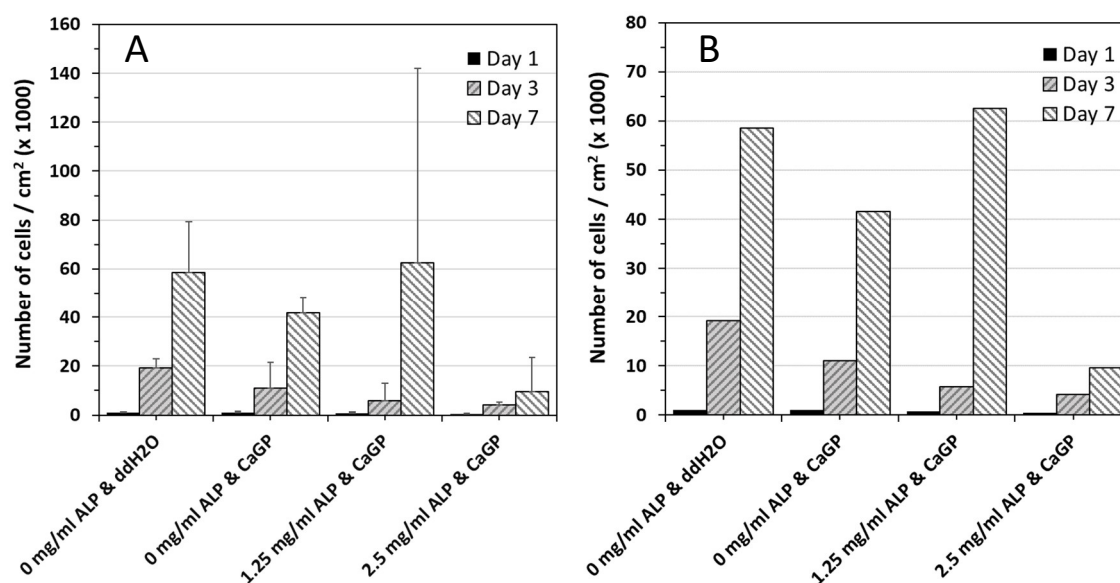

**Figure S1.** The population density of MG-63 osteoblast like cells on days 1, 4 and 7 after seeding, obtained by direct counting cells on microphotographs. Cells were cultured on electron beam-treated (40 kGy) gelatin hydrogels with ALP concentrations of 0, 1.25 and 2.5 mg/ml, incubated in either ddH<sub>2</sub>O or CaGP. Mean ± Standard Deviation (A) or mean only (B) from 2-4 representative microphotographs (each representing an area of approx. 40 mm<sup>2</sup>) for each experimental group and time interval.
